# Supplementary material for: Performance analysis of automated evaluation of antinuclear antibody indirect immunofluorescent tests in a routine setting
Source: Springer Nature journal article supplement (doi:10.1007/s13317-018-0108-y), 2018-09-20
Supplement: MOESM1 [file 16143284]

## **Supplementary data**

Supplementary Table 1. Comparison of non-adjusted software-generated and visual positive/negative classification.

Supplementary Table 2. Comparison of visual positive/negative classification between the two users.

Supplementary Table 3. Comparison of non-adjusted software-generated ANA pattern classification.

**Supplementary Table 1.** Comparison of non-adjusted software-generated and visual positive/negative classification.

|                                              |                           | Visual evaluation observer 1 |          |           | Visual evaluation observer 2 |          |           |
|----------------------------------------------|---------------------------|------------------------------|----------|-----------|------------------------------|----------|-----------|
|                                              |                           | Negative                     | Positive | Total (N) | Negative                     | Positive | Total (N) |
| EUROPattern<br>(EPa)Software<br>not adjusted | Negative                  | 593                          | 10       | 603       | 550                          | 53       | 603       |
|                                              | Positive                  | 164                          | 266      | 430       | 115                          | 315      | 430       |
|                                              | Total (N)                 | 757                          | 276      | 1033      | 665                          | 368      | 1033      |
|                                              |                           |                              |          |           |                              |          |           |
|                                              | Kappa agreement           | 0.64                         |          |           | 0.66                         |          |           |
|                                              | Relative sensitivity* (%) | 96.4                         |          |           | 85.6                         |          |           |
|                                              | Relative Specificity* (%) | 70.7                         |          |           | 82.7                         |          |           |

\*In order to calculate relative sensitivity and specificity, observer (1 or 2) is considered the reference method.

**Supplementary Table 2.** Comparison of visual positive/negative classification between the two users.

|                              |                           | Visual evaluation observer 1 |          | Total (N) |
|------------------------------|---------------------------|------------------------------|----------|-----------|
|                              |                           | Negative                     | Positive |           |
| Visual evaluation observer 2 | Negative                  | 660                          | 5        | 665       |
|                              | Positive                  | 97                           | 271      | 368       |
|                              | Total (N)                 | 757                          | 276      | 1033      |
|                              |                           |                              |          |           |
|                              | Kappa agreement           | 0.77                         |          |           |
|                              | Relative Sensitivity* (%) | 98.2                         |          |           |
|                              | Relative Specificity* (%) | 87.2                         |          |           |

\* In order to calculate relative sensitivity and specificity, observer 1 is considered the reference method.

**Supplementary Table 3.** Comparison of non-adjusted software-generated ANA pattern classification.

|           | Homogeneous |           | Speckled   |           | Nucleolar  |           |
|-----------|-------------|-----------|------------|-----------|------------|-----------|
|           | Unadjusted  | Adjusted  | Unadjusted | Adjusted  | Unadjusted | Adjusted  |
| TP        | 143         | 147       | 53         | 55        | 37         | 34        |
| <b>FP</b> | <b>43</b>   | <b>80</b> | <b>89</b>  | <b>90</b> | <b>140</b> | <b>20</b> |
| TN        | 833         | 796       | 881        | 880       | 856        | 976       |
| FN        | 14          | 10        | 10         | 8         | 0          | 3         |

TP = true positive; FP = false positive; TN = true negative; FN = false negative; observer 1 is considered the reference method.
